# Supplementary material
Source: publisher figshare collection journal article supplement (https://frontiersin.figshare.com/ndownloader/files/14747261)
Supplement: Supplementary file [file 14747261]

| CCLE peripheral blood: 783 DEGs |                  |                   |                       |                                                                                             |         |                                | Disease related pathways and processes |           |          |            |          |    |    |     |    |    |     |          |
|---------------------------------|------------------|-------------------|-----------------------|---------------------------------------------------------------------------------------------|---------|--------------------------------|----------------------------------------|-----------|----------|------------|----------|----|----|-----|----|----|-----|----------|
| Probeset ID                     | Entrez Gene      | Gene Symbol       | Chromosomal Location  | Gene Title                                                                                  | p-value | FC (CCLE patients vs. Control) | Apop                                   | Oxid: Red | Cell adh | Cyto-chemo | Leu chem | NK | DC | TLR | TC | BC | IFN | Lys/Prot |
| 39463 at                        | 22848            | AAK1              | chr2p14               | AP2 associated kinase 1                                                                     | 0.027   | -1.2                           |                                        |           |          |            |          |    |    |     |    |    | ✓   |          |
| 35390 at                        | 23460            | ABCA6             | chr17q24.3            | ATP-binding cassette, sub-family A (ABC1), member 6                                         | 0.033   | -1.2                           |                                        |           |          |            |          |    |    |     |    |    |     |          |
| 41681 at                        | 22               | ABCB7             | chrXq13.3             | ATP-binding cassette, sub-family B (MDR/TAP), member 7                                      | 0.014   | 1.2                            |                                        |           |          |            |          |    |    |     |    |    |     |          |
| 40294 at                        | 23457            | ABCB9             | chr12q24              | ATP-binding cassette, sub-family B (MDR/TAP), member 9                                      | 0.015   | -1.2                           |                                        | ✓         |          |            |          |    |    |     |    |    |     | ✓        |
| 1930 at                         | 8714             | ABCC3             | chr17q22              | ATP-binding cassette, sub-family C (CFTR/MRP), member 3                                     | 0.001   | -1.4                           |                                        |           |          |            |          |    |    |     |    |    |     |          |
| 37261 g at                      | 10060            | ABCC9             | chr12p12.1            | ATP-binding cassette, sub-family C (CFTR/MRP), member 9                                     | 0.014   | -1.2                           |                                        |           |          |            |          |    |    |     |    |    |     |          |
| 1635 at                         | 25               | ABL1              | chr9q34.1             | c-abl oncogene 1, non-receptor tyrosine kinase                                              | 0.047   | 1.2                            | ✓                                      |           | ✓        |            |          |    |    |     |    |    | ✓   |          |
| 39058 at                        | 29               | ABR               | chr17p13.3            | active BCR-related gene                                                                     | 0.030   | 1.3                            |                                        |           |          |            |          |    |    |     |    |    |     |          |
| 36417 s at                      | 30               | ACAA1             | chr3p23-p22           | acetyl-CoA acyltransferase 1                                                                | 0.030   | 1.4                            |                                        | ✓         |          |            |          |    |    |     |    |    |     |          |
| 39207 t at                      | 176              | ACAV              | chr15q26.1            | aggrecan                                                                                    | 0.046   | -1.4                           |                                        |           | ✓        |            |          |    |    |     |    |    |     |          |
| 37246 at                        | 65057            | ACD               | chr16q22.1            | adrenocortical dysplasia homolog (mouse)                                                    | 0.033   | -1.1                           |                                        |           |          |            |          |    |    |     |    |    |     |          |
| 41058 g at                      | 55856            | ACOT13            | chr6p22.3             | acyl-CoA thioesterase 13                                                                    | 0.012   | 1.5                            |                                        |           |          |            |          |    |    |     |    |    |     |          |
| 34160 at                        | 71               | ACTG1             | chr17q25              | actin, gamma 1                                                                              | 0.028   | 1.2                            |                                        |           |          |            |          |    |    |     |    |    |     |          |
| 41654 at                        | 100              | ADA               | chr20q13.12           | adenosine deaminase                                                                         | 0.008   | 1.5                            |                                        |           | ✓        |            | ✓        |    |    |     | ✓  |    | ✓   |          |
| 37091 g at                      | 1587             | ADAM3A            | chr8p11.23            | ADAM metalloproteinase domain 3A                                                            | 0.012   | -1.2                           |                                        |           |          |            |          |    |    |     |    |    |     |          |
| 36269 at                        | 9508             | ADAMTS3           | chr4q13.3             | ADAM metalloproteinase with thrombospondin type 1 motif, 3                                  | 0.041   | -1.2                           |                                        |           |          |            |          |    |    |     |    |    |     |          |
| 33353 at                        | 107              | ADCY1             | chr7p13-p12           | adenylate cyclase 1 (brain)                                                                 | 0.042   | -1.2                           |                                        |           |          | ✓          |          |    |    |     |    |    | ✓   |          |
| 34686 at                        | 108              | ADCY2             | chr5p15.3             | adenylate cyclase 2 (brain)                                                                 | 0.036   | -1.2                           |                                        |           |          | ✓          |          |    |    |     |    |    | ✓   |          |
| 39383 at                        | 112              | ADCY6             | chr12q12-q13          | adenylate cyclase 6                                                                         | 0.038   | -1.2                           |                                        |           |          | ✓          |          |    |    |     |    |    | ✓   |          |
| 34637 t at                      | 124              | ADH1A             | chr4q23               | alcohol dehydrogenase 1A (class I), alpha polypeptide                                       | 0.029   | -1.1                           |                                        | ✓         |          |            |          |    |    |     |    |    |     |          |
| 31550 at                        | 153              | ADRB1             | chr10q24-q26          | adrenergic, beta-1-, receptor                                                               | 0.029   | -1.5                           |                                        |           |          |            |          |    |    |     |    |    |     |          |
| 34315 at                        | 10939            | AFG3L2            | chr18p11              | AFG3 ATPase family gene 3-like 2 (S. cerevisiae)                                            | 0.043   | 1.4                            |                                        |           |          |            |          |    |    |     |    |    |     |          |
| 38852 at                        | 116986           | AGAP2             | chr12q14.1            | ArfGAP with GTPase domain, ankyrin repeat and PH domain 2                                   | 0.042   | -1.3                           |                                        |           |          |            |          |    |    |     |    |    |     |          |
| 31664 at                        | 3268             | AGFG2             | chr7q22.1             | ArfGAP with FG repeats 2                                                                    | 0.016   | -1.3                           |                                        |           |          |            |          |    |    |     |    |    |     |          |
| 37880 at                        | 189              | AGXT              | chr2q37.3             | alanine-glyoxylate aminotransferase                                                         | 0.030   | -1.3                           |                                        |           |          |            |          |    |    |     |    |    |     |          |
| 34728 g at                      | 10768            | AHCYL1            | chr1p13.2             | adenosylhomocysteinease-like 1                                                              | 0.050   | 1.6                            |                                        |           |          |            |          |    |    |     |    |    |     |          |
| 36497 at                        | 113146           | AHNAK2            | chr14q32.33           | AHNAK nucleoprotein 2                                                                       | 0.004   | -1.2                           |                                        |           |          |            |          |    |    |     |    |    |     |          |
| 34439 at                        | 9447             | AIM2              | chr1q22               | absent in melanoma 2                                                                        | 0.029   | -1.1                           | ✓                                      |           |          |            |          |    |    |     |    |    | ✓   |          |
| 41250 at                        | 7965             | AIMP2             | chr7p22               | aminoacyl tRNA synthetase complex-interacting multifunctional protein 2                     | 0.006   | 1.4                            |                                        |           |          |            |          |    |    |     |    |    |     |          |
| 40685 at                        | 221              | ALDH3B1           | chr11q13              | aldehyde dehydrogenase 3 family, member B1                                                  | 0.012   | 1.6                            |                                        |           |          |            |          |    |    |     |    |    |     |          |
| 678 at                          | 251              | ALPLP2            | chr2q37               | alkaline phosphatase, placental-like 2                                                      | 0.050   | -1.4                           |                                        |           |          |            |          |    |    |     |    |    |     |          |
| 33532 at                        | 8092             | ALX1              | chr12q21.31           | ALX homeobox 1                                                                              | 0.014   | -1.2                           |                                        |           | ✓        |            |          |    |    |     |    |    |     |          |
| 41706 at                        | 114899 /// 23600 | AMACR /// C1QTNF3 | chr5p13               | alpha-methylacyl-CoA racemase /// C1q and tumor necrosis factor related protein 3           | 0.000   | -1.2                           |                                        |           |          |            |          |    |    |     |    |    |     |          |
| 35502 at                        | 269              | AMHR2             | chr12q13              | anti-Mullerian hormone receptor, type II                                                    | 0.032   | -1.2                           |                                        |           |          | ✓          |          |    |    |     |    |    |     |          |
| 32919 at                        | 347902           | AMIGO2            | chr12q13.11           | adhesion molecule with Ig-like domain 2                                                     | 0.012   | -1.1                           |                                        |           | ✓        |            |          |    |    |     |    |    |     |          |
| 36865 at                        | 23357            | ANGEL1            | chr14q24.3            | angel homolog 1 (Drosophila)                                                                | 0.010   | -1.2                           |                                        |           |          |            |          |    |    |     |    |    |     |          |
| 38199 at                        | 90806            | ANGEL2            | chr1q32.3             | angel homolog 2 (Drosophila)                                                                | 0.028   | -1.2                           |                                        |           |          |            |          |    |    |     |    |    |     |          |
| 40347 at                        | 81611            | ANP32E            | chr1q21.2             | acidic (leucine-rich) nuclear phosphoprotein 32 family, member E                            | 0.023   | 1.5                            |                                        |           |          |            |          |    |    |     |    |    |     |          |
| 37747 at                        | 308              | ANXA5             | chr4q26-q28/q27       | annexin A5                                                                                  | 0.020   | 1.9                            |                                        |           |          |            |          |    |    |     |    |    |     |          |
| 35593 at                        | 314              | AOC2              | chr17q21              | amine oxidase, copper containing 2 (retina-specific)                                        | 0.019   | -1.3                           |                                        |           |          |            |          |    |    |     |    |    |     |          |
| 36161 at                        | 163              | AP2B1             | chr17q11.2-q12        | adaptor-related protein complex 2, beta 1 subunit                                           | 0.039   | 1.4                            |                                        |           |          |            |          |    |    |     |    |    |     |          |
| 32030 at                        | 10239            | AP3S2             | chr15q26.1            | adaptor-related protein complex 3, sigma 2 subunit                                          | 0.035   | 1.2                            |                                        |           |          |            |          |    |    |     |    |    |     | ✓        |
| 40148 at                        | 323              | APBB2             | chr4p13               | amyloid beta (A4) precursor protein-binding, family B, member 2                             | 0.025   | -1.1                           |                                        |           |          |            |          |    |    |     |    |    |     |          |
| 39106 at                        | 335              | APOA1             | chr11q23-q24          | apolipoprotein A-I                                                                          | 0.047   | -1.3                           |                                        |           |          |            |          |    | ✓  |     |    |    |     |          |
| 261 s at                        | 338              | APOB              | chr2p24-p23           | apolipoprotein B (including Ag(x) antigen)                                                  | 0.018   | -1.2                           |                                        |           |          |            |          |    |    |     |    |    |     |          |
| 41472 at                        | 60489            | APOBEC3G          | chr22q13.1-q13.2      | apolipoprotein B mRNA editing enzyme, catalytic polypeptide-like 3G                         | 0.018   | 2.4                            |                                        |           |          |            |          |    |    |     |    |    |     |          |
| 40430 at                        | 375              | ARF1              | chr1q42.13            | ADP-ribosylation factor 1                                                                   | 0.048   | -1.3                           |                                        |           |          |            |          |    |    |     |    |    |     |          |
| 34725 at                        | 2909             | ARHGAP35          | chr19q13.3            | glucocorticoid receptor DNA binding factor 1                                                | 0.045   | -1.2                           |                                        |           |          |            |          |    |    |     |    |    |     |          |
| 35505 at                        | 8289             | ARID1A            | chr1p35.3             | AT rich interactive domain 1A (SWI-like)                                                    | 0.048   | -1.4                           |                                        |           |          |            |          |    |    |     |    |    | ✓   |          |
| 31375 at                        | 403              | ARL3              | chr10q23.3            | ADP-ribosylation factor-like 3                                                              | 0.049   | -1.2                           |                                        |           |          |            |          |    |    |     |    |    |     |          |
| 39829 at                        | 10123            | ARL4C             | chr2q37.1             | ADP-ribosylation factor-like 4C                                                             | 0.030   | 1.7                            |                                        |           |          |            |          |    |    |     |    |    |     |          |
| 32701 at                        | 421              | ARVCF             | chr22q11.21           | armadillo repeat gene deleted in velocardiofacial syndrome                                  | 0.013   | -1.1                           |                                        |           | ✓        |            |          |    |    |     |    |    |     |          |
| 31875 at                        | 51665            | ASB1              | chr2q37               | ankyrin repeat and SOCS box-containing 1                                                    | 0.018   | 1.1                            | ✓                                      |           |          |            |          |    |    |     |    |    |     |          |
| 287 at                          | 467              | ATF3              | chr1q32.3             | activating transcription factor 3                                                           | 0.002   | 1.2                            | ✓                                      |           |          |            |          |    |    |     |    |    | ✓   |          |
| 41235 at                        | 468              | ATF4              | chr22q13.1            | activating transcription factor 4 (tax-responsive enhancer element B67)                     | 0.039   | 1.6                            | ✓                                      |           |          |            |          |    |    |     |    |    | ✓   |          |
| 32439 at                        | 496              | ATP4B             | chr13q34              | ATPase, H <sup>+</sup> /K <sup>+</sup> exchanging, beta polypeptide                         | 0.033   | -1.3                           |                                        |           |          |            |          |    |    |     |    |    |     |          |
| 34811 at                        | 518              | ATP5G3            | chr2q31.1             | ATP synthase, H <sup>+</sup> transporting, mitochondrial Fo complex, subunit C3 (subunit 9) | 0.046   | 1.5                            |                                        |           |          |            |          |    |    |     |    |    |     |          |
| 36107 at                        | 522              | ATP5J             | chr21q21.1            | ATP synthase, H <sup>+</sup> transporting, mitochondrial Fo complex, subunit F6             | 0.024   | 1.5                            |                                        |           |          |            |          |    |    |     |    |    |     |          |
| 40134 at                        | 9551             | ATP5J2            | chr7q22.1             | ATP synthase, H <sup>+</sup> transporting, mitochondrial Fo complex, subunit F2             | 0.029   | 1.5                            |                                        |           |          |            |          |    |    |     |    |    |     |          |
| 33854 at                        | 51382            | ATP6V1D           | chr14q23-q24.2        | ATPase, H <sup>+</sup> transporting, lysosomal 34kDa, V1 subunit D                          | 0.042   | 1.4                            |                                        |           |          |            |          |    |    |     |    |    |     |          |
| 37367 at                        | 529              | ATP6V1E1          | chr22pter-q11.22q11.1 | ATPase, H <sup>+</sup> transporting, lysosomal 31kDa, V1 subunit E1                         | 0.034   | 1.2                            |                                        |           |          |            |          |    |    |     |    |    |     |          |
| 37395 at                        | 9296             | ATP6V1F           | chr7q32               | ATPase, H <sup>+</sup> transporting, lysosomal 14kDa, V1 subunit F                          | 0.044   | 1.3                            |                                        | ✓         |          |            |          |    |    |     |    |    |     |          |
| 33741 at                        | 51606            | ATP6V1H           | chr8q11.2             | ATPase, H <sup>+</sup> transporting, lysosomal 50/57kDa, V1 subunit H                       | 0.012   | 1.2                            |                                        |           |          |            |          |    |    |     |    |    |     | ✓        |
| 33634 at                        | 5205             | ATP8B1            | chr18q21-q22/18q21.31 | ATPase, aminophospholipid transporter, class I, type 8B, member 1                           | 0.031   | -1.2                           |                                        |           |          |            |          |    |    |     |    |    |     |          |
| 36142 at                        | 6310             | ATXN1             | chr6p23               | ataxin 1                                                                                    | 0.041   | 1.6                            |                                        |           |          |            |          |    |    |     |    |    |     |          |
| 34487 at                        | 6310             | ATXN3             | chr6p23               | ataxin 3                                                                                    | 0.017   | -1.2                           |                                        |           |          |            |          |    |    |     |    |    |     |          |
| 39401 at                        | 552889           | ATXN7L3B          | chr12q21              | ataxin 7-like 3B                                                                            | 0.010   | 1.2                            |                                        |           |          |            |          |    |    |     |    |    |     |          |
| 41582 at                        | 10677            | AVIL              | chr12q14.1            | advillin                                                                                    | 0.012   | -1.2                           |                                        |           |          |            |          |    |    |     |    |    |     |          |
| 1278 at                         | 558              | AXL               | chr19q13.1            | AXL receptor tyrosine kinase                                                                | 0.017   | 1.4                            |                                        |           |          |            |          |    |    |     |    |    |     |          |
| 39432 at                        | 8702             | B4GALT4           | chr3q13.3             | UDP-Gal-beta-GlcNAc beta 1,4- galactosyltransferase, polypeptide 4                          | 0.004   | 1.5                            |                                        |           |          |            |          |    |    |     |    |    |     |          |
| 41115 s at                      | 8938             | BAIAP3            | chr16p13.3            | BAI1-associated protein 3                                                                   | 0.026   | -1.3                           |                                        |           |          |            |          |    |    |     |    |    |     |          |
| 1801 at                         | 580              | BARD1             | chr2q34-q35           | BRCA1 associated RING domain 1                                                              | 0.034   | 2                              |                                        |           |          |            |          |    |    |     |    |    |     |          |
| 35425 at                        | 8538             | BARX2             | chr11q25              | BARX homeobox 2                                                                             | 0.007   | -1.2                           |                                        |           | ✓        |            |          |    |    |     |    |    |     |          |
| 1909 at                         | 596              | BCL2              | chr18q21.33/18q21.3   | B-cell CLL/lymphoma 2                                                                       | 0.044   | 1.3                            | ✓                                      |           | ✓        |            | ✓        |    |    |     | ✓  |    | ✓   |          |
| 31611 s at                      | 10018            | BCL2L11           | chr2q13               | BCL2-like 11 (apoptosis facilitator)                                                        | 0.002   | 1.2                            | ✓                                      |           | ✓        |            |          |    |    |     |    |    |     |          |
| 1339 s at                       | 613              | BCR               | chr22q11/22q11.23     | breakpoint cluster region                                                                   | 0.029   | -1.1                           |                                        |           |          |            |          |    |    |     |    |    |     |          |
| 32127 at                        | 636              | BICD1             | chr12p11.2-p11.1      | bicaudal D homolog 1 (Drosophila)                                                           | 0.023   | 1.1                            |                                        |           |          |            |          |    |    |     |    |    |     |          |
| 35266 at                        | 10904            | BLCAP             | chr20q11.23           | bladder cancer associated protein                                                           | 0.012   | 1.3                            |                                        |           |          |            |          |    |    |     |    |    |     |          |
| 1544 at                         | 641              | BLM               | chr15q26.1            | Bloom syndrome, RecQ helicase-like                                                          | 0.019   | 1.4                            |                                        |           |          |            | ✓        |    |    |     | ✓  |    |     |          |

[illegible]

[illegible]

[illegible]

[illegible]

[illegible]

[illegible]

[illegible]



[illegible]

|            |       |                |                     |                                                       |       |      |   |  |  |   |  |  |  |  |  |  |  |  |
|------------|-------|----------------|---------------------|-------------------------------------------------------|-------|------|---|--|--|---|--|--|--|--|--|--|--|--|
| 36102_at   | 7419  | <i>VDAC3</i>   | chr8p11.2           | voltage-dependent anion channel 3                     | 0.040 | 1.3  |   |  |  |   |  |  |  |  |  |  |  |  |
| 334_s_at   | 7432  | <i>VIP</i>     | chr6q25             | vasoactive intestinal peptide                         | 0.041 | -1.3 |   |  |  |   |  |  |  |  |  |  |  |  |
| 40001_r_at | 23230 | <i>VPS13A</i>  | chr9q21             | vacuolar protein sorting 13 homolog A (S. cerevisiae) | 0.027 | 1.2  |   |  |  |   |  |  |  |  |  |  |  |  |
| 35779_at   | 11311 | <i>VPS45</i>   | chr1q21.2           | vacuolar protein sorting 45 homolog (S. cerevisiae)   | 0.024 | 1.4  |   |  |  |   |  |  |  |  |  |  |  |  |
| 34281_at   | 7447  | <i>VSNL1</i>   | chr2p24.3           | visinin-like 1                                        | 0.017 | -1.1 |   |  |  |   |  |  |  |  |  |  |  |  |
| 38987_at   | 79084 | <i>WDR77</i>   | chr1p13.2           | WD repeat domain 77                                   | 0.012 | -1.2 |   |  |  |   |  |  |  |  |  |  |  |  |
| 35164_at   | 7466  | <i>WFS1</i>    | chr4p16             | Wolfram syndrome 1 (wolframin)                        | 0.034 | -1.3 | ✓ |  |  |   |  |  |  |  |  |  |  |  |
| 33392_at   | 26100 | <i>WIP2</i>    | chr7p22.1           | WD repeat domain, phosphoinositide interacting 2      | 0.018 | 1.3  |   |  |  |   |  |  |  |  |  |  |  |  |
| 32359_at   | 8840  | <i>WISP1</i>   | chr8q24.22          | WNT1 inducible signaling pathway protein 1            | 0.011 | -1.2 |   |  |  | ✓ |  |  |  |  |  |  |  |  |
| 32358_at   | 8838  | <i>WISP3</i>   | chr6q21             | WNT1 inducible signaling pathway protein 3            | 0.005 | -1.3 |   |  |  |   |  |  |  |  |  |  |  |  |
| 33718_at   | 58525 | <i>WIZ</i>     | chr19p13.1          | widely interspaced zinc finger motifs                 | 0.033 | -1.2 |   |  |  |   |  |  |  |  |  |  |  |  |
| 35305_at   | 7511  | <i>XPNPEP1</i> | chr10q25.3          | X-prolyl aminopeptidase (aminopeptidase P) 1, soluble | 0.036 | 1.2  |   |  |  |   |  |  |  |  |  |  |  |  |
| 40824_at   | 23039 | <i>XPO7</i>    | chr8p21             | exportin 7                                            | 0.021 | 1.5  |   |  |  |   |  |  |  |  |  |  |  |  |
| 38977_at   | 8565  | <i>YARS</i>    | chr1p35.1           | tyrosyl-tRNA synthetase                               | 0.009 | 1.4  |   |  |  |   |  |  |  |  |  |  |  |  |
| 31922_l_at | 9189  | <i>ZBED1</i>   | chrXp22.33 and Yp11 | zinc finger, BED-type containing 1                    | 0.017 | -1.2 |   |  |  |   |  |  |  |  |  |  |  |  |
| 38532_at   | 9880  | <i>ZBTB39</i>  | chr12q13.3          | zinc finger and BTB domain containing 39              | 0.009 | -1.1 |   |  |  |   |  |  |  |  |  |  |  |  |
| 32587_at   | 678   | <i>ZFP36L2</i> | chr2p22.3-p21       | zinc finger protein 36, C3H type-like 2               | 0.032 | 1.6  |   |  |  |   |  |  |  |  |  |  |  |  |
| 35611_at   | 7539  | <i>ZFP37</i>   | chr9q32             | zinc finger protein 37 homolog (mouse)                | 0.050 | -1.2 |   |  |  |   |  |  |  |  |  |  |  |  |
| 37943_at   | 23503 | <i>ZFYVE26</i> | chr14q24.1          | zinc finger, FYVE domain containing 26                | 0.018 | 1.4  |   |  |  |   |  |  |  |  |  |  |  |  |
| 34611_at   | 7745  | <i>ZKSCAN8</i> | chr6p21.3           | zinc finger with KRAB and SCAN domains 8              | 0.006 | -1.1 |   |  |  |   |  |  |  |  |  |  |  |  |
| 37116_at   | 23613 | <i>ZMYND8</i>  | chr20q13.12         | zinc finger, MYND-type containing 8                   | 0.007 | -1.1 |   |  |  |   |  |  |  |  |  |  |  |  |
| 36392_at   | 7694  | <i>ZNF135</i>  | chr19q13.4          | zinc finger protein 135                               | 0.018 | -1.2 |   |  |  |   |  |  |  |  |  |  |  |  |
| 41393_at   | 7748  | <i>ZNF195</i>  | chr11p15.5          | zinc finger protein 195                               | 0.003 | 1.3  |   |  |  |   |  |  |  |  |  |  |  |  |
| 35838_at   | 57862 | <i>ZNF410</i>  | chr14q24.3          | zinc finger protein 410                               | 0.022 | 1.3  |   |  |  |   |  |  |  |  |  |  |  |  |

**Supplementary Table 1. CCLE DEGs (blood ) associated with enriched, disease-related pathways and processes.** We delineated an extended 783 DEGs from a comparison of peripheral blood of 3 CCLE patients vs. 3 healthy control individuals (fold change (FC) ≥ ±1.1 and p-value at <0.05). Eighty seven DEGs (in **bold**) are shared between the blood and our previously published skin expression profile (PMID: 24956118). Six of the 87 shared DEGs (**bold and underlined**) have corresponding genes in both lists which are either synonymous or have similar functions. Disease-related pathways and processes that are associated with DEGs in both blood and skin profiles are marked with ✓.

Abbreviations used : **FC**, Fold change, **CCLE**, chronic cutaneous lupus erythematosus.  
Disease related pathways and processes: **Apopt**: apoptosis, **Oxid:Red**: oxidation/reduction, **Cell adh**: cell adhesion, **Cyto-chemo**: cytokine/chemokine, **Leu che**: leukocyte chemotaxis, **NK**: NK cells, **TLR**: Toll like receptor signaling, **DC**: Dendritic cells, **TC**: T cell, **BC**: B cell, **IFN**: Type I interferon and **Lys/Prot**: lysosome/ proteasome related.

**Running title:** Interactome analysis: Cutaneous lupus- Dey-Rao and Sinha, 2018
